# Supplementary material
Source: Elsevier journal article supplement (https://www.sciencedirect.com/science/article/pii/S253006442100095X)
Supplement: mmc1 [file S253006442100095X:mmc1.docx]

Supplementary material S1

List of wasps recorded in 16 coffee producing landscapes in southeastern Brazil. N means the total number of individuals per species. The columns coffee and forest represent the total number of individuals collected in each habitat type.

| **WASP SPECIES** | **N** | **coffee** | **forest** |
| --- | --- | --- | --- |
| *Agelaia angulata* (Fabricius, 1804) | 8 | 3 | 5 |
| *Agelaia multipicta* (Haliday, 1836) | 2277 | 1266 | 1011 |
| *Agelaia pallens* | 4 | 0 | 4 |
| *Agelaia pallipes* (Olivier, 1792) | 1206 | 894 | 312 |
| *Agelaia vicina* (de Saussure, 1854) | 2562 | 1295 | 1267 |
| *Alphamenes campanulatus* (Fabricius, 1804) | 1 | 0 | 1 |
| *Alphamenes* sp. | 2 | 2 | 0 |
| *Apoica pallens* (Fabricius, 1804) | 71 | 67 | 4 |
| *Brachygastra augusti* (de Saussure, 1854) | 2 | 1 | 1 |
| *Brachygastra lecheguana* (Latreille, 1824) | 90 | 86 | 4 |
| *Brachygastra mouleae* Richards, 1978 | 2 | 1 | 1 |
| *Cyphomenes anisitsii* (Bréthes, 1906) | 1 | 1 | 0 |
| *Hypancistrocerus* sp.1 | 13 | 13 | 0 |
| *Hypancistrocerus* sp.2 | 2 | 2 | 0 |
| *Metapolybia cingulata* (Fabricius, 1804) | 1 | 0 | 1 |
| *Metapolybia* sp. | 1 | 1 | 0 |
| *Mischocyttarus cassununga* (von Ihering, 1903) | 15 | 8 | 7 |
| *Mischocyttarus cearensis* Richards, 1978 | 3 | 1 | 2 |
| *Mischocyttarus drewseni* de Saussure, 1857 | 18 | 18 | 0 |
| *Mischocyttarus rotundicollis* (Cameron, 1912) | 51 | 29 | 22 |
| *Mischocyttarus socialis* (de Saussure, 1854) | 6 | 6 | 0 |
| *Mischocyttarus* sp.1 | 2 | 2 | 0 |
| *Mischocyttarus* sp.2 | 1 | 0 | 1 |
| *Mischocyttarus* sp.3 | 1 | 0 | 1 |
| *Monobia* sp. | 1 | 0 | 1 |
| *Montezumia ferruginea* de Saussure, 1852 | 2 | 1 | 1 |
| *Montezumia petiolata* de Saussure, 1855 | 1 | 1 | 0 |
| *Montezumia* sp | 1 | 1 | 0 |
| *Omicron graculum* (Zavattari, 1912) | 1 | 1 | 0 |
| *Omicron microscopicum* (de Saussure, 1852) | 1 | 1 | 0 |
| *Omicron ruficolle* (Zavattari, 1912) | 1 | 1 | 0 |
| *Omicron* sp.1 | 2 | 2 | 0 |
| *Omicron* sp.2 | 1 | 1 | 0 |
| *Omicron* sp.3 | 1 | 1 | 0 |
| *Omicron tuberculatum* (Fox, 1899) | 2 | 2 | 0 |
| *Pachodynerus guadulpensis* (de Saussure, 1853) | 7 | 5 | 2 |
| *Pachymenes ater* de Saussure, 1852 | 18 | 5 | 13 |
| *Pachymenes bipartitus* (Fox, 1899) | 1 | 1 | 0 |
| *Pachymenes ghilianii* (Spinola, 1851) | 5 | 3 | 2 |
| *Pachymenes laeviventris* (Fox, 1899) | 1 | 1 | 0 |
| *Pachymenes olympicus* (Zavattari, 1912) | 2 | 1 | 1 |
| *Pachymenes sericeus* de Saussure, 1852 | 3 | 3 | 0 |
| *Parancistrocerus* sp.1 | 1 | 1 | 0 |
| *Parancistrocerus* sp.2 | 1 | 1 | 0 |
| *Pirhosigma superficiale* (Fox, 1899) | 6 | 6 | 0 |
| *Polistes billardieri* Fabricius, 1804 | 1 | 1 | 0 |
| *Polistes cinerescens* de Saussure, 1854 | 3 | 2 | 1 |
| *Polistes erythrocephalus* Latreille, 1813 | 35 | 33 | 2 |
| *Polistes lanio* (Fabricius, 1775) | 4 | 4 | 0 |
| *Polistes melanosoma* de Saussure, 1853 | 1 | 1 | 0 |
| *Polistes pacificus* Fabricius, 1804 | 4 | 4 | 0 |
| *Polistes simillimus* Zikán, 1851 | 42 | 38 | 4 |
| *Polistes* sp.1 | 1 | 1 | 0 |
| *Polistes subsericeus* de Saussure, 1854 | 3 | 3 | 0 |
| *Polistes versicolor* (Olivier, 1792) | 143 | 116 | 27 |
| *Polybia bifasciata* de Saussure, 1854 | 7 | 4 | 3 |
| *Polybia chrysothotax* (Lichtenstein, 1796) | 143 | 57 | 86 |
| *Polybia dimidiata* (Olivier, 1792) | 14 | 9 | 5 |
| *Polybia fastidiosuscula* de Saussure, 1854 | 585 | 415 | 170 |
| *Polybia ignobilis* (Haliday, 1836) | 362 | 287 | 75 |
| *Polybia jurinei* de Saussure, 1854 | 103 | 70 | 33 |
| *Polybia minarum* Ducke, 1906 | 47 | 26 | 21 |
| *Polybia ocidentalis* (Olivier, 1792) | 513 | 396 | 117 |
| *Polybia paulista* von Ihering, 1896 | 831 | 768 | 63 |
| *Polybia punctata* du Buysson, 1908 | 288 | 130 | 158 |
| *Polybia sericea* (Olivier, 1792) | 175 | 146 | 29 |
| *Protonectarina sylveirae* (de Saussure, 1854) | 99 | 97 | 2 |
| *Protopolybia exigua* (de Saussure, 1854) | 4 | 4 | 0 |
| *Protopolybia sedula* (de Saussure, 1854) | 16 | 15 | 1 |
| *Pseudodynerus griseus* (Fox, 1902) | 1 | 0 | 1 |
| *Pseudopolybia vespiceps* (de Saussure, 1863) | 7 | 4 | 3 |
| *Stenonartonia apicipennis* (Fox, 1902) | 1 | 1 | 0 |
| *Synoeca cyanea* (Fabricius, 1775) | 12 | 7 | 5 |
| *Zeta argillaceum* (Linnaeus, 1758) | 2 | 2 | 0 |
| *Zethus fuscus* (Perty, 1833) | 1 | 0 | 1 |
| **Total wasp abundance** | **9847** | **6376** | **3471** |
| **Total wasp species richness** | **76** | **68** | **43** |

For the identification of wasps, we used Andena and Carpenter (2012), Richards (1978) and Santos Junior et al. (2015) for Polistinae. We also used Bohart and Stange (1965), Giordani Soika (1990), Willink and Roig-Alsina (1998), Carpenter and Garcete-Barrett (2002) and Grandinete et al. (2015) for the identification of Eumeninae.

**References**

Andena, S.R., Carpenter, J.M., 2012. A phylogenetic analysis of the social waps genus Brachygastra Perty, 1833, and description of a new species (Hymenoptera; Vespidae: Epiponini). Am. Mus. Novit. 3753, 1-38.

Richards, O.W., 1978. The social wasps of the Americas excluding the Vespinae. British Museum of Natural History, London.

Santos-Junior, J.N., Silveira, O.T., Carpenter, J.M., 2015. Phylogeny of Protopolybia Ducke, 1905 and taxonomic revision of the Protopolybia exígua species-group (Hymenoptera: Vespidae, Polistinae) with description of four new species. Zootaxa. 3956, 151-182.

Bohart, R.M., Stange, L.A., 1965. A revision of the genus Zethus Fabricius in the Western Hemisphere (Hymenoptera: Eumenidae). University of California Press, California.

Giordani Soika, A., 1990. Revisione degli Eumenidi neotropicale appartenenti ai generi Pachymenes Sauss., Santamenes n. gen., Brachymenes G.S., Stenosigma G.S. e Gamma Zav. (Hymenoptera). Bolletino dela Museo Civico de Storia Naturale di Venezia. 39, 71-172.

Carpenter, J.M., Garcete-Barrett, B.R., 2002. A key to the Neotropical genera of Eumeninae (Hymenoptera: Vespidae). Bol. Mus. Nac. Hist. Nat. Parag. 14, 52-73.

Grandinete, Y.C., Hermes, M.G., Carpenter, J.M., 2015. Systematics and phylogeny of the Neotropical Pachymenes de Saussure and Santamenes Giordani Soika (Hymenoptera, Vespidae, Eumeninae). Syst. Entomol.40, 365-384.

Willink, A., Roig-Alsina, A., 1998. Revision del genero Pachodynerus Saussure (Hymenoptera: Vespidae, Eumeninae). Contrib. Am. Entomol. Inst. 30, 1-117.
